# Supplementary material for: Ultrasensitive detection of nitroexplosive – picric acid via a conjugated polyelectrolyte in aqueous media and solid support
Source: Royal Society of Chemistry journal article supplement (doi:10.1039/c5cc02194d), 2015-01-01
Supplement: c5cc02194d1.pdf [file c5cc02194d1.pdf]

## **Electronic Supplementary Information**

# Ultrasensitive detection of nitro explosive-picric acid *via* conjugated polyelectrolyte in aqueous media and solid support

*Sameer Hussain,<sup>a</sup> Akhtar Hussain Malik,<sup>a</sup> Mohammad Adil Afroz,<sup>a</sup> and  
Parameswar Krishnan Iyer<sup>a,b\*</sup>*

<sup>a</sup>Department of Chemistry, Indian Institute of Technology Guwahati, Guwahati-781039, India

<sup>b</sup>Centre for Nanotechnology, Indian Institute of Technology Guwahati, Guwahati, 781039, India

AUTHOR EMAIL ADDRESS: [pki@iitg.ernet.in](mailto:pki@iitg.ernet.in)

AUTHOR FAX: +91 361 258 2349

## Experimental Section

**Caution!** The nitroaromatics used in the study, especially picric acid, are highly explosives in nature and should be handled cautiously in small quantities with safety measures to avoid any explosion.

### Materials and Methods

Nitroexplosives *viz.* 2, 6-DNT, 2, 4-DNT, 4-NT, 1, 3-DNB and chitosan were purchased from Aldrich Chemicals. Picric acid was purchased from Loba Chemie. All other chemicals and reagents and were purchased from Alfa-Aesar and Merck and were used without further purification. Milli-Q water was used in all the experiments. UV/visible spectra were recorded on a Perkin Elmer Lambda-25 spectrophotometer. Photoluminescence spectra were taken on a Horiba Fluoromax-4 spectrofluorometer using 10 mm path length quartz cuvettes with a slit width of 2 nm at 298 K. Electrochemical measurements were performed using a CH instruments Model 700D series Electrochemical workstation. Paper strip tests were performed using Whatman® qualitative filter paper, Grade 1. Time resolved fluorescence studies were performed in an Edinburgh Instruments Life Spec II instrument.

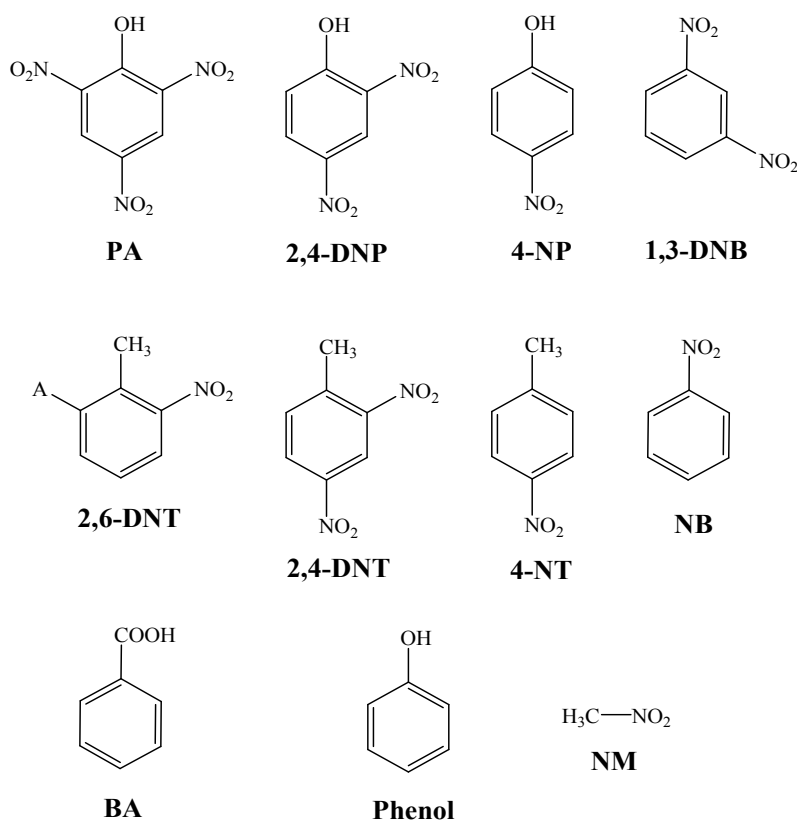

**Scheme S1:** Structures of various nitroexplosives and electron deficient compounds used in the experiments.

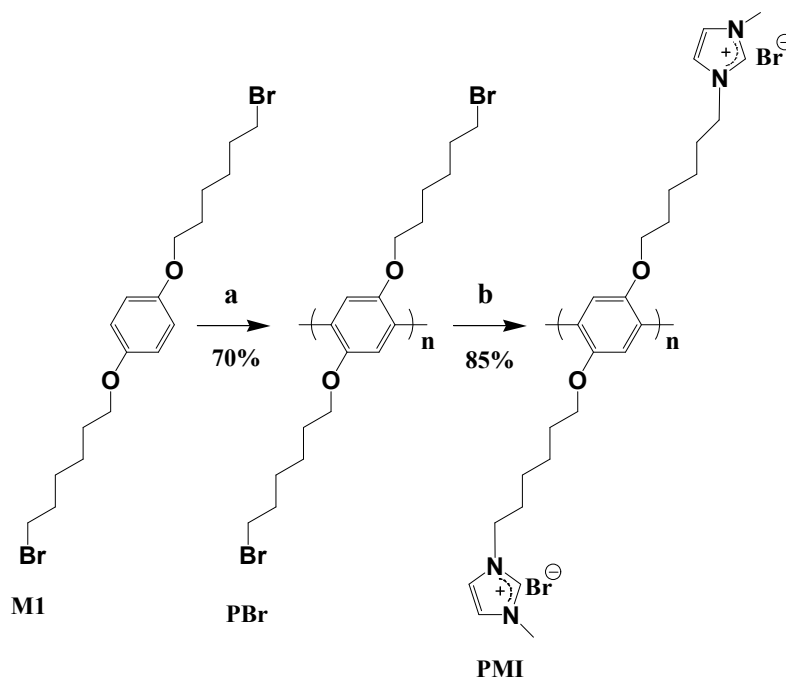

**Scheme S2.** (a)  $\text{FeCl}_3$ , nitrobenzene, RT, 36 hr (b) 1-methyl imidazole, reflux, 24 hr.

### Synthesis of M1 and PBr

Synthesis of monomer M1 and polymer PBr was carried out using a previously established procedure.<sup>1-3</sup>

### Synthesis of PMI

The polymer PMI was prepared according to the previously reported method.<sup>4</sup> In a 100mL round-bottom flask, PBr (0.12 mmol, 1eq.) and excess 1-methyl imidazole were taken and kept for reflux under stirring condition in an oil bath at 80°C for 24 hours. The reaction mixture was then poured into excess chloroform and stirred for 1 hr to get precipitate. The process was repeated twice to remove excess 1-methyl imidazole and PBr. The precipitate was then filtered out and dried to obtain brownish colored product. Yield: 85%

$^1\text{H}$  NMR (600 MHz,  $\text{DMSO-}d_6$ ,  $\delta$ ): 9.38 (b, 2H), 7.75 (b, 2H), 7.69 (b, 2H), 7.02 (b, 2H), 4.18 (b, 2H), 3.87 (b, 10H), 1.90 (b, 4H), 1.76 (b, 4H), 1.29 (b, 4H), 1.24 (b, 4H).

$^{13}\text{C}$  NMR (150 MHz,  $\text{DMSO-}d_6$ ,  $\delta$ ): 149.47, 136.50, 128.64, 123.50, 122.25, 114.20, 68.73, 48.69, 35.78, 29.79, 28.70, 28.49, 25.53.

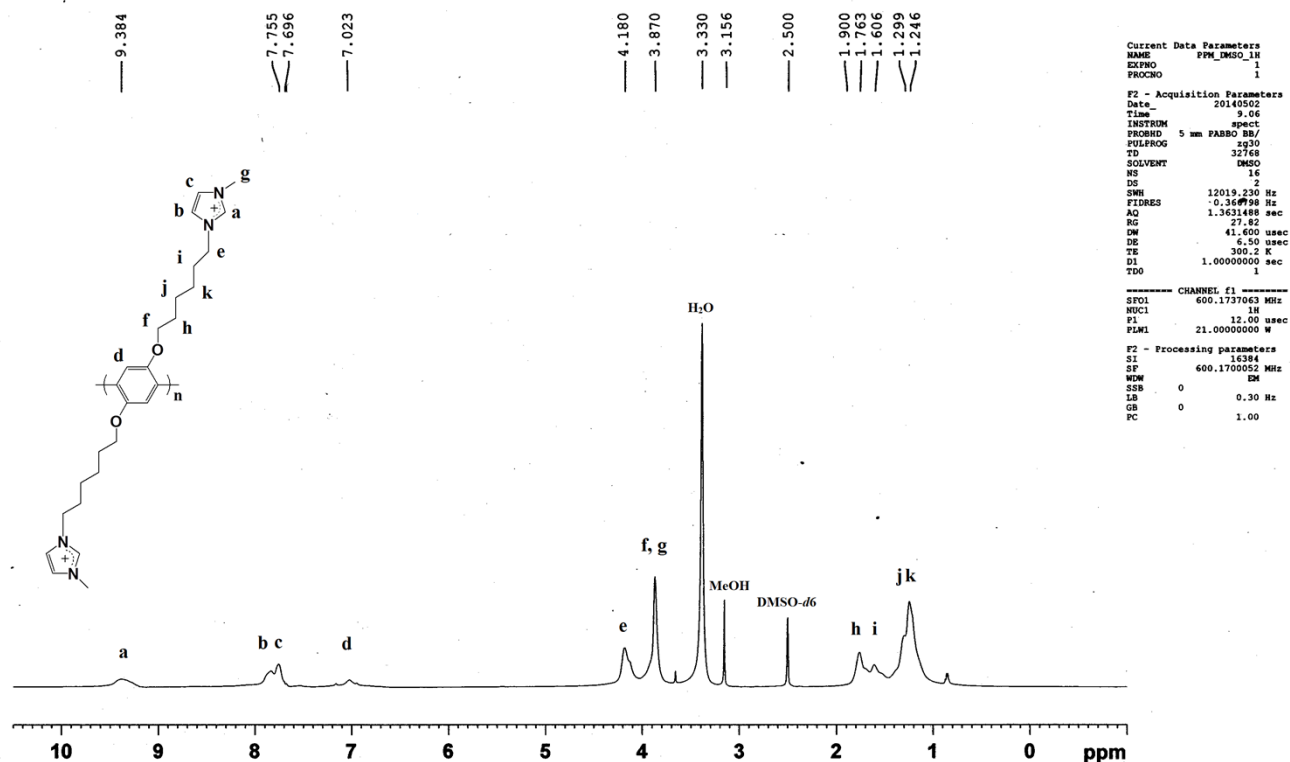

Fig. S1  $^1\text{H}$  NMR (600MHz, DMSO- $d_6$ ) spectrum of PMI.

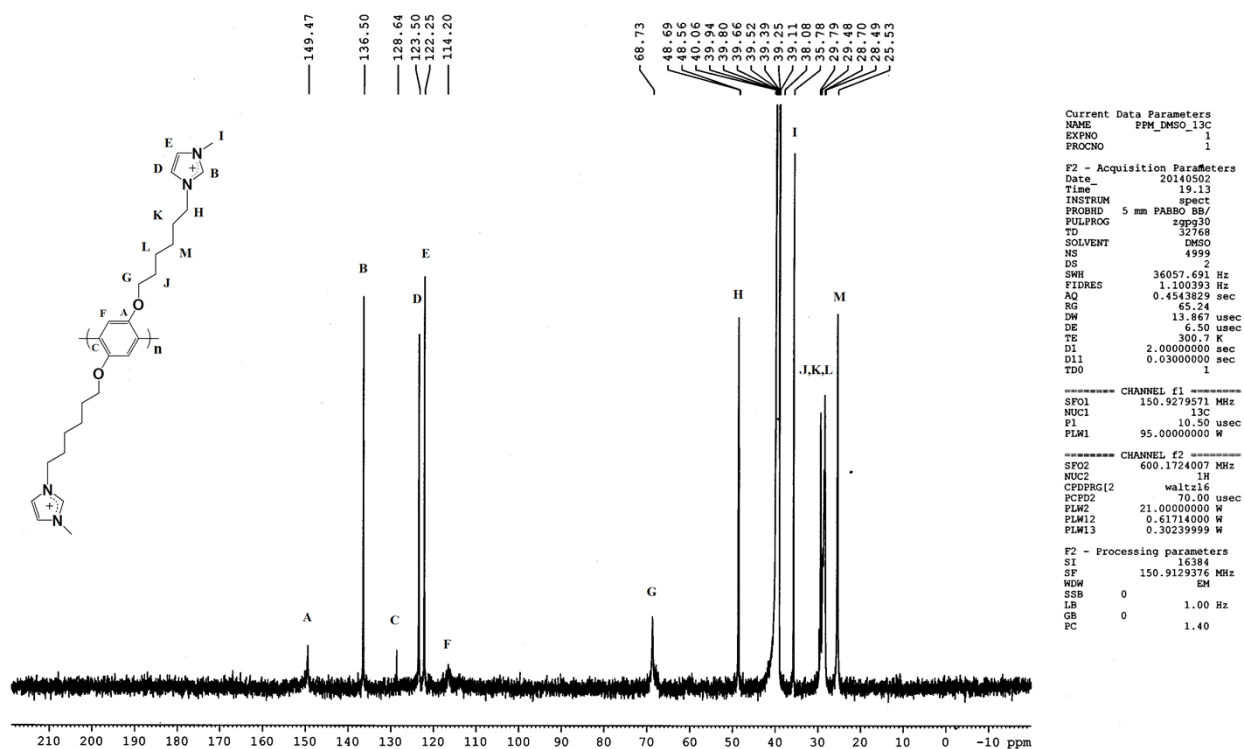

Fig. S2  $^{13}\text{C}$  NMR (150MHz, DMSO- $d_6$ ) spectrum of PMI.

## Sensing Studies in Aqueous Solution

Stock solution of the polymer PMI and other analytes *viz.* nitrobenzene, nitromethane, benzoic acid, phenol, 4-nitrophenol, 2,4-dinitrophenol were prepared in MilliQ water at concentrations of  $1 \times 10^{-3}$  M and  $1 \times 10^{-4}$  M, respectively. Stock solution of other nitroaromatics *viz.* 2,6-Dinitrotoluene, 2,4-Dinitrotoluene, 4-Nitrotoluene, 1,3-Dinitrobenzene were prepared at concentrations of  $1 \times 10^{-4}$  M, in HPLC grade THF. The absorption measurements and fluorescence titrations of the polymer PMI with different analytes were carried out by sequentially adding 1  $\mu$ L to 3 mL aqueous solution containing  $2 \times 10^{-5}$  M PMI in a quartz cuvette (1 cm  $\times$  1 cm). The absorption and fluorescence spectra of the resultant mixtures were then recorded after mixing thoroughly at room temperature.

## Calculation of Overlap Integral Values and Förster Radius

To identify the extent of energy transfer, overlap integral values for all analytes were calculated using the equation<sup>5</sup> shown below

$$J(\lambda) = \int_0^{\infty} F_D(\lambda) \epsilon_A(\lambda) \lambda^4 d\lambda$$

where,  $F_D(\lambda)$  denotes the corrected fluorescence intensity of donor in the range of  $\lambda$  to  $\lambda + \Delta\lambda$  with the total intensity normalized to unity,  $\epsilon_A$  is molar absorptivity of the acceptor at  $\lambda$  in  $M^{-1} \text{ cm}^{-1}$ . The Förster distance  $R_0$  was also calculated for PMI-PA interaction using the expression shown below

$$R_0 = 0.211[JQ(\eta^{-4})(k^2)]^{1/6}$$

where,  $J$  is the degree of spectral overlap between donor fluorescence spectrum and the acceptor absorption spectrum,  $Q$  is fluorescence quantum yield of the donor (without acceptor),  $\eta$  is the refractive index of the medium and  $k^2$  is the dipole orientation factor usually taken as 0.667.

### **Preparation of Fluorescence Test Strips**

Test strips were prepared by dip-coating Whatman filter paper (70 mm diameter) in the methanolic solution of PMI ( $10^{-4}$  M) followed by removal of solvent in an air stream. PMI coated filter papers were then cut into desired number of pieces ( $1\text{ cm} \times 1\text{ cm}$ ) and used as solid support for the surface sensing purpose.

### **Preparation of Fluorescence Film and its Sensing towards PA**

In a 50 mL beaker containing PMI (5 mg) and purified chitosan (100 mg), 10 mL Milli-Q water and 100  $\mu\text{L}$  of acetic acid were added followed by continuous stirring for about 15 min to ensure complete dissolution of chitosan. This leads to the formation of highly viscous liquid which was spread on pre-cleaned glass plate/petri dish and dried for 2 hr at  $50^{\circ}\text{C}$  in vacuum oven. A homogeneous transparent film was obtained that could be easily lifted using forceps for sensing purposes.

For contact mode sensing, 2 mg of PA was rubbed with the left hand thumb, and brushed properly to remove all visible PA particles. Left thumb was then pressed onto the film for 10 sec, kept aside and the impression observed under UV light. Right hand thumb was used as control without using PA. Similar procedure was applied for studying selectivity of the film. 5mg of each solid analyte was rubbed with fingertip and brushed properly to remove all the visible particles before pressing it onto the film. For liquid samples, 2 drops of each analyte were casted on fingertip followed by air drying and pressed onto the film.

### **Calculation of Detection Limit**

For calculating detection limit, different samples of PMI ( $2 \times 10^{-5}$  M) each containing PA (0 nM, 5 nM, 10 nM, 15 nM, 20 nM, 25 nM, 30 nM, 35 nM and 40 nM) were prepared separately and fluorescence spectrum was then recorded for each sample by exciting at 325 nm. The detection limit plot for PA was obtained by plotting change in the fluorescence

intensity vs the concentration of PA. The curve demonstrates a linear relationship and the correlation coefficient ( $R^2$ ) via linear regression analysis was calculated to be 0.998. The limit of detection (LOD) was then calculated using the equation  $3\sigma/K$ , where  $\sigma$  denotes the standard deviation for the intensity of PMI in the absence of picric acid and K represents slope of the equation.

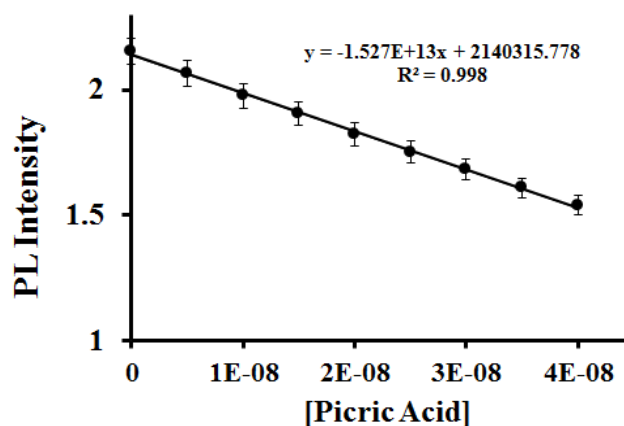

**Fig. S3** Fluorescence intensity of PMI ( $2 \times 10^{-5}$  M) in aqueous solution as a function of PA concentration.

$$\text{LOD} = 3 \times \text{S.D.}/k$$

$$\begin{aligned} \text{LOD} &= 3 \times 2856.067 / 1.527 \times 10^{13} \\ &= 56.11 \times 10^{-11} \text{ M (128ppt)} \end{aligned}$$

**Table S1:** A comparative study of the  $K_{sv}$ , detection limit and medium used for PA detection of some recent representative reports.

| Publication                                      | Material used                      | $K_{sv}$ ( $M^{-1}$ ) | Detection Limit                                | Medium Used             |
|--------------------------------------------------|------------------------------------|-----------------------|------------------------------------------------|-------------------------|
| <i>Present Manuscript</i>                        | <i>Conjugated polyelectrolyte</i>  | $1.0 \times 10^7$     | $56.11 \times 10^{-11} \text{ M}$<br>(128 ppt) | $H_2O$                  |
| <i>Angew. Chem. Int. Ed.</i> ,<br>2013, 52, 2881 | Metal-organic framework            | $3.5 \times 10^4$     | -                                              | $CH_3CN$                |
| <i>Chem. Eur. J.</i> , 2014,<br>20, 12215        | $\alpha$ -cyanostilbene derivative | $3.3 \times 10^5$     | $2.8 \times 10^{-7} \text{ M}$                 | $H_2O/THF$<br>(v/v=7:3) |
| <i>Chem. Eur. J.</i> 2014, 20,<br>195            | Tetraphenylethelene Nanosphere     | $3.0 \times 10^4$     | $5 \times 10^{-9} \text{ M}$                   | $H_2O/THF$<br>(v/v=9:1) |

|                                                                    |                                               |                                             |                                                |                                        |
|--------------------------------------------------------------------|-----------------------------------------------|---------------------------------------------|------------------------------------------------|----------------------------------------|
| <i>Chem. Mater.</i> , <b>2014</b> ,<br>26, 4221                    | Graphene derivative                           | $8.9 \times 10^5$                           | 300 ppb                                        | H <sub>2</sub> O/THF<br>(v/v=9:1)      |
| <i>Chem. Commun.</i> , <b>2014</b> ,<br>50, 15788                  | Organic cage                                  | $2.2 \times 10^5$                           | 6.4 ppb                                        | DCM                                    |
| <i>ACS Appl. Mater.<br/>Interfaces</i> , <b>2014</b> , 6,<br>10722 | Graphene oxide                                | $1.3 \times 10^5$                           | 125 ppb                                        | Buffer                                 |
| <i>ACS Appl. Mater.<br/>Interfaces</i> , <b>2013</b> , 5,<br>5373  | Hexa-peri-<br>hexabenzocoronene<br>derivative | $3.2 \times 10^6$<br>&<br>$2.0 \times 10^6$ | $4 \times 10^{-9}$ M &<br>$9 \times 10^{-9}$ M | H <sub>2</sub> O/THF<br>(v/v=4:6)      |
| <i>Inorg. Chem.</i> <b>2013</b> , 52,<br>4860                      | Hexaphenylbenzene<br>derivative               | $1.9 \times 10^5$                           | 6.8 ppb                                        | H <sub>2</sub> O/THF<br>(v/v=4:6)      |
| <i>ACS Appl. Mater.<br/>Interfaces</i> , <b>2013</b> , 5, 672      | Pentacenequinone<br>derivative                | $1.5 \times 10^4$                           | $3.5 \times 10^{-7}$ M                         | Toluene/DC<br>M<br>(v/v=8:2)           |
| <i>Chem. Commun.</i> , <b>2014</b> ,<br>50, 6031                   | Iridium(III) complex                          | $5.2 \times 10^4$                           | -                                              | H <sub>2</sub> O/Aceton<br>e (v/v=9:1) |
| <i>J. Org. Chem.</i> <b>2013</b> ,<br>78, 1306                     | Tris imidazolium salt                         | $3.8 \times 10^4$<br>&<br>$3.3 \times 10^4$ | -                                              | DMSO                                   |
| <i>Chem. Commun.</i> , <b>2012</b> ,<br>48, 5007                   | Fluoranthene<br>derivative                    | $9.9 \times 10^4$                           | 20 ppb                                         | Ethanol                                |
| <i>ACS Appl. Mater.<br/>Interfaces</i> , <b>2013</b> , 5,<br>8394  | <i>p</i> -phenylenevinylene<br>derivative     | $5.5 \times 10^4$                           | $1.1 \times 10^{-8}$                           | Brij-58<br>Micelles                    |

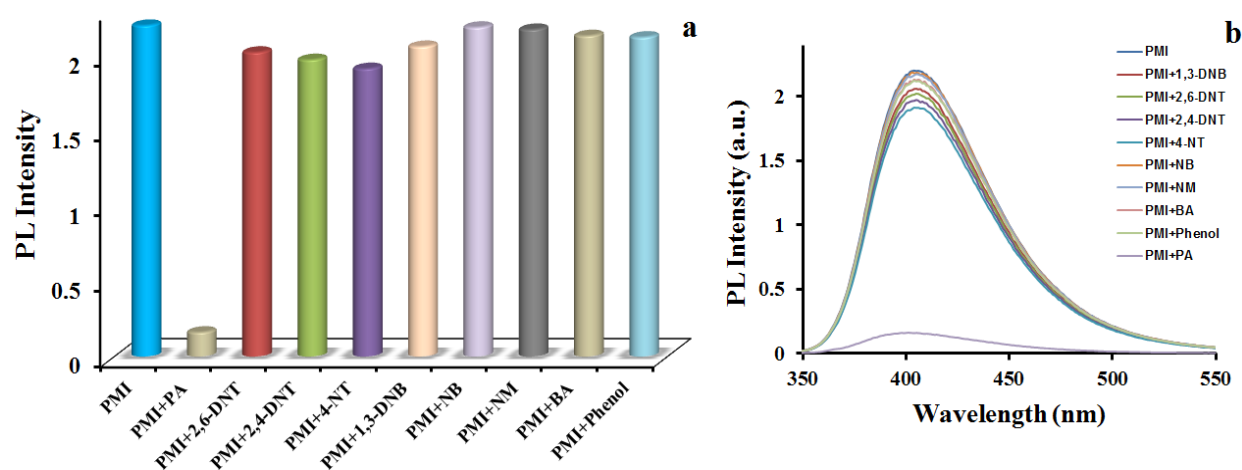

**Fig. S4** (a) Bar diagram depicting the effect of various analytes ( $6.67 \times 10^{-6}$  M) on fluorescence emission of PMI ( $2 \times 10^{-5}$  M) in aqueous media. (b) Corresponding photoluminescence spectra.



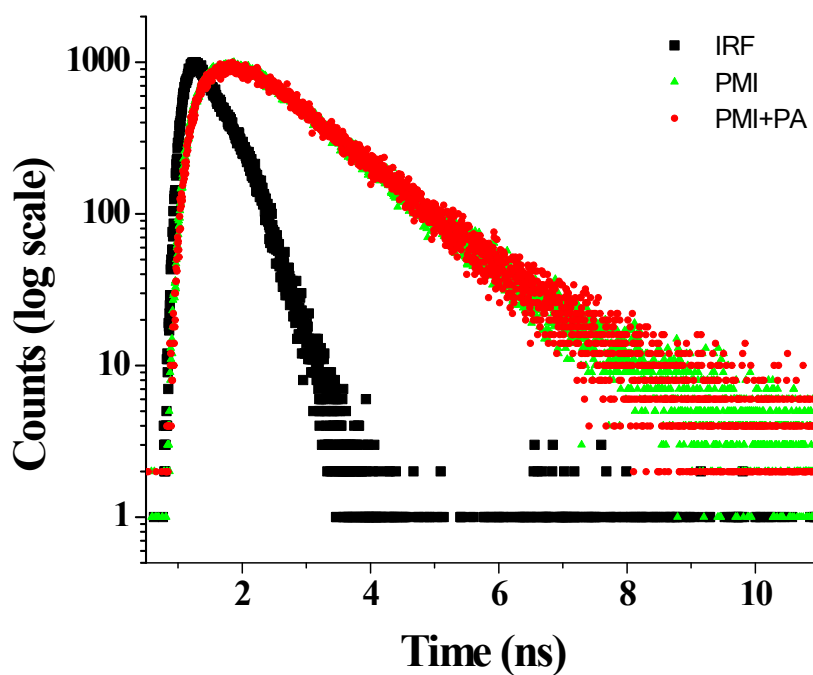

**Fig. S5** Lifetime decay profile for PMI with PA ( $\lambda_{\text{ex}} = 308 \text{ nm}$ , monitored at 410 nm).

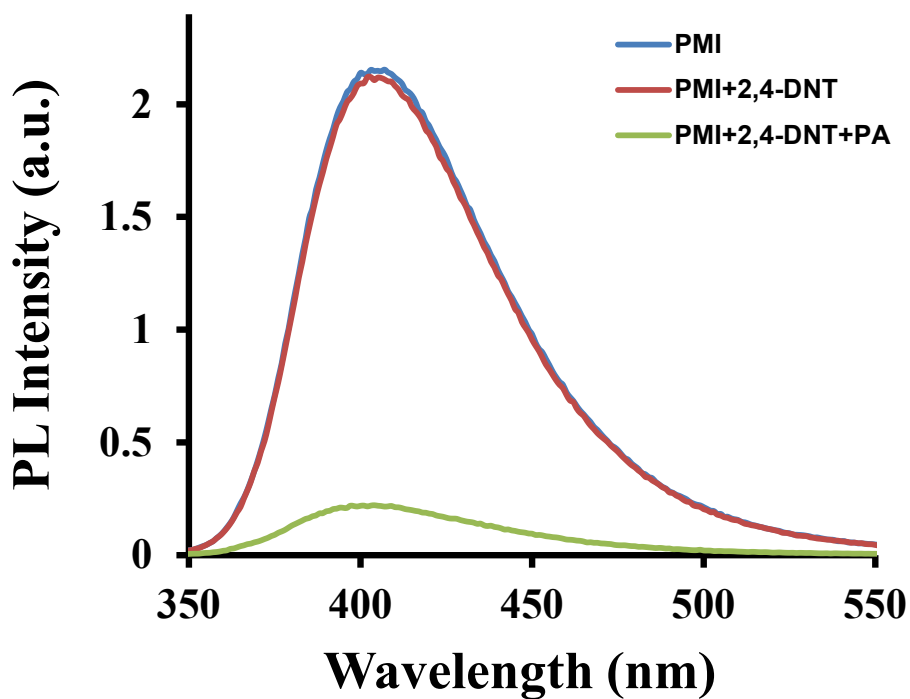

**Fig. S6** Change in emission spectra of PMI ( $2 \times 10^{-5} \text{ M}$ ) with 2,4-DNT ( $6.67 \times 10^{-7} \text{ M}$ ) followed by addition of PA ( $6.67 \times 10^{-7} \text{ M}$ ).

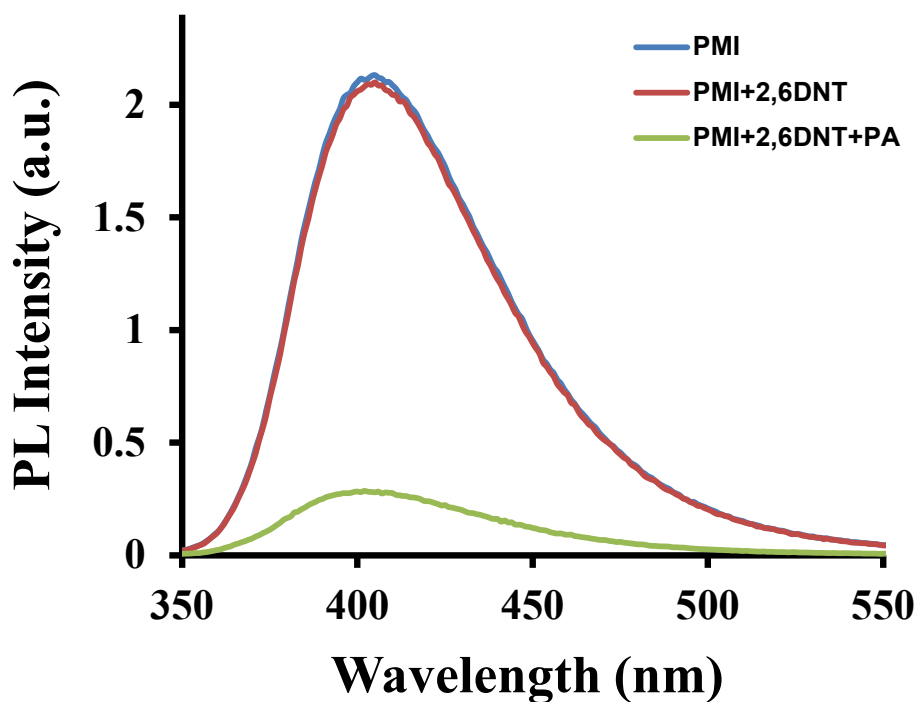

**Fig. S7** Change in emission spectra of PMI ( $2 \times 10^{-5}$  M) with 2,6-DNT ( $6.67 \times 10^{-7}$  M) followed by addition of PA ( $6.67 \times 10^{-7}$  M).

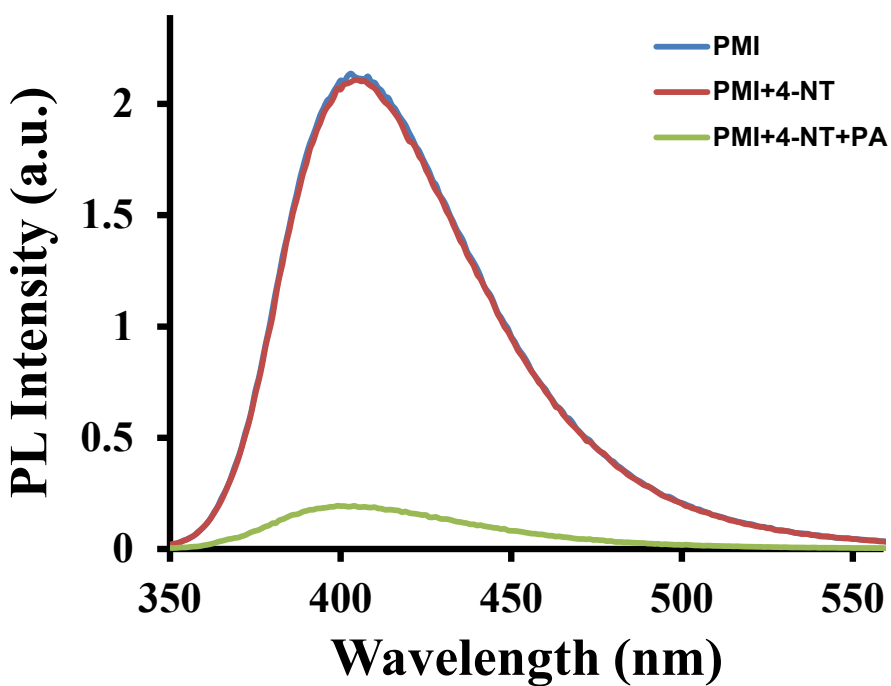

**Fig. S8** Change in emission spectra of PMI ( $2 \times 10^{-5}$  M) with 4-NT ( $6.67 \times 10^{-7}$  M) followed by addition of PA ( $6.67 \times 10^{-7}$  M).

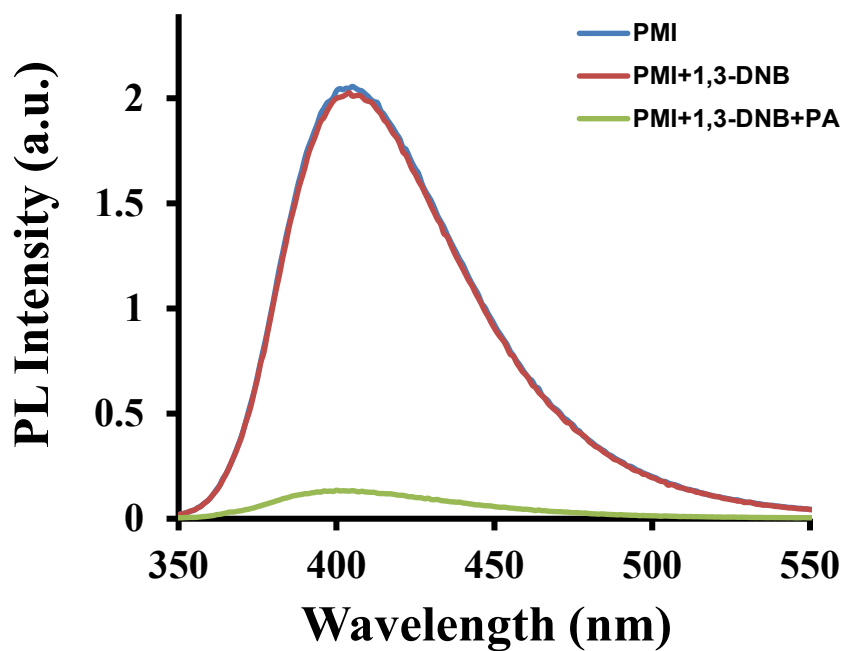

**Fig. S9** Change in emission spectra of PMI ( $2 \times 10^{-5}$  M) with 1,3-DNB ( $6.67 \times 10^{-7}$  M) followed by addition of PA ( $6.67 \times 10^{-7}$  M).

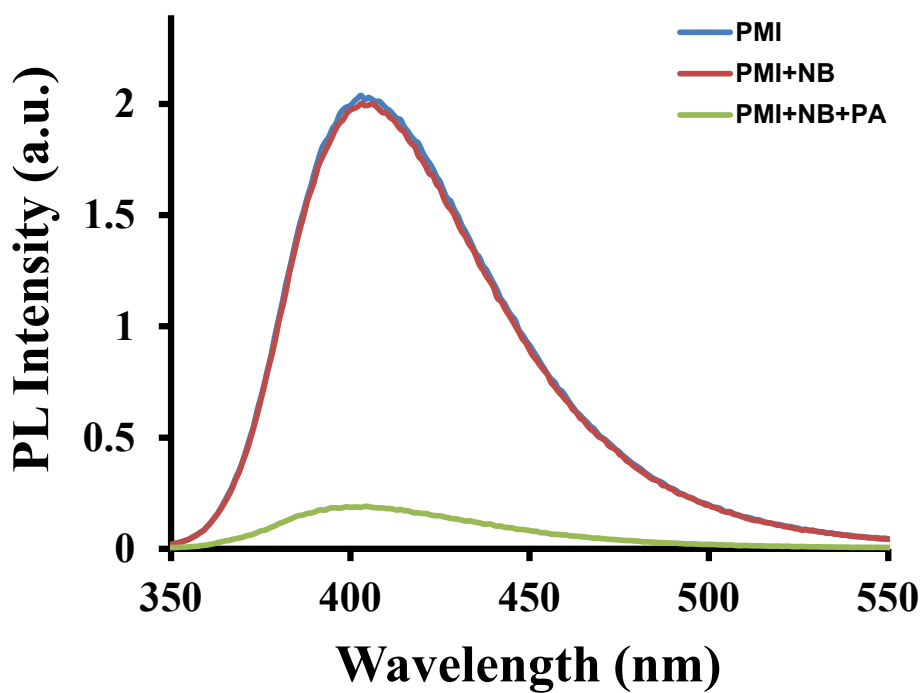

**Fig. S10** Change in emission spectra of PMI ( $2 \times 10^{-5}$  M) with NB ( $6.67 \times 10^{-7}$  M) followed by addition of PA ( $6.67 \times 10^{-7}$  M).

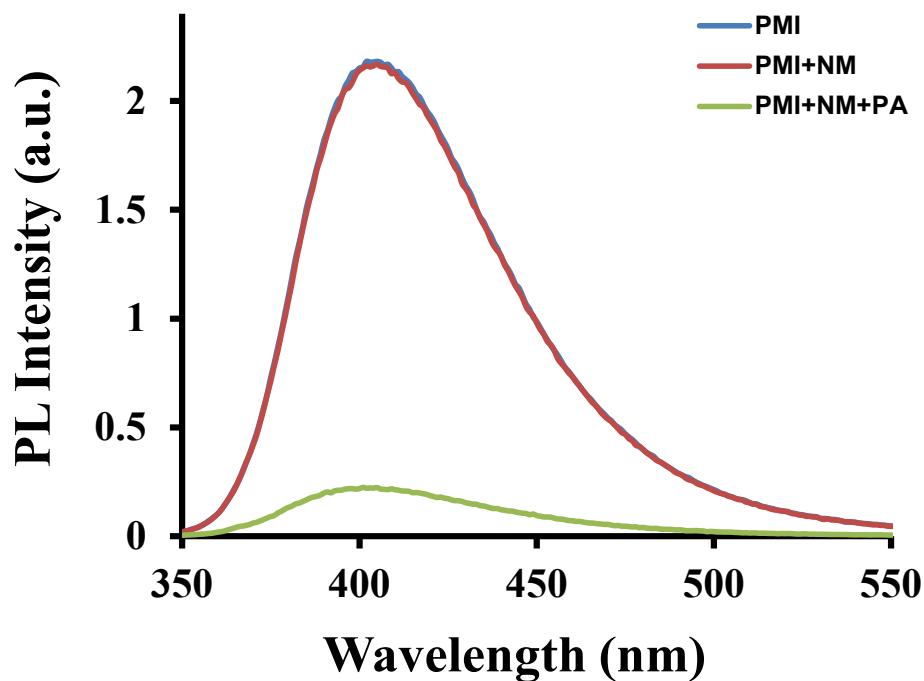

**Fig. S11** Change in emission spectra of PMI ( $2 \times 10^{-5}$  M) with NM ( $6.67 \times 10^{-7}$  M) followed by addition of PA ( $6.67 \times 10^{-7}$  M).

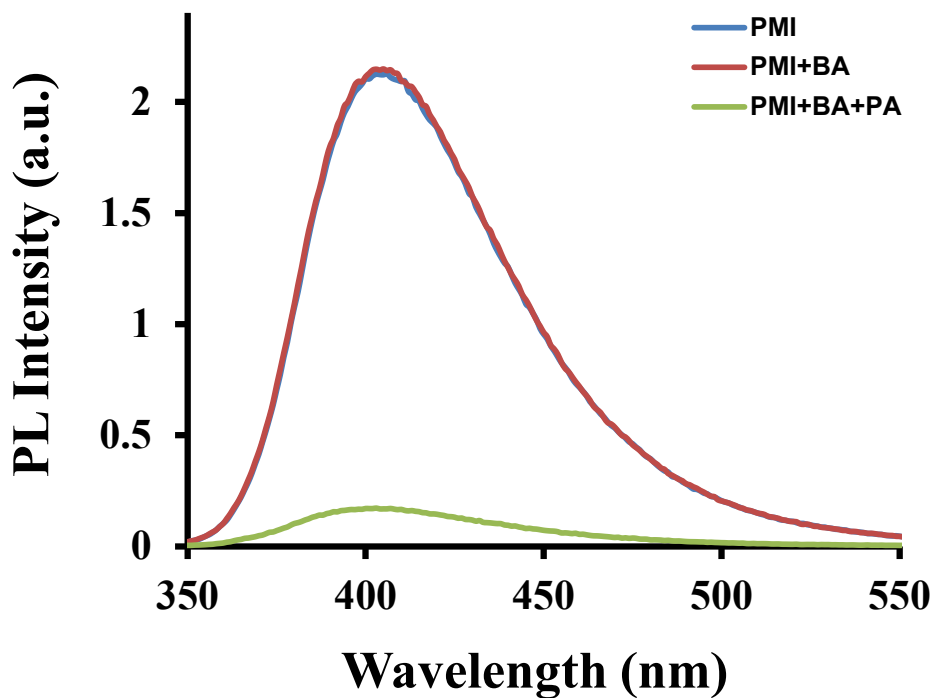

**Fig. S12** Change in emission spectra of PMI ( $2 \times 10^{-5}$  M) with BA ( $6.67 \times 10^{-7}$  M) followed by addition of PA ( $6.67 \times 10^{-7}$  M).

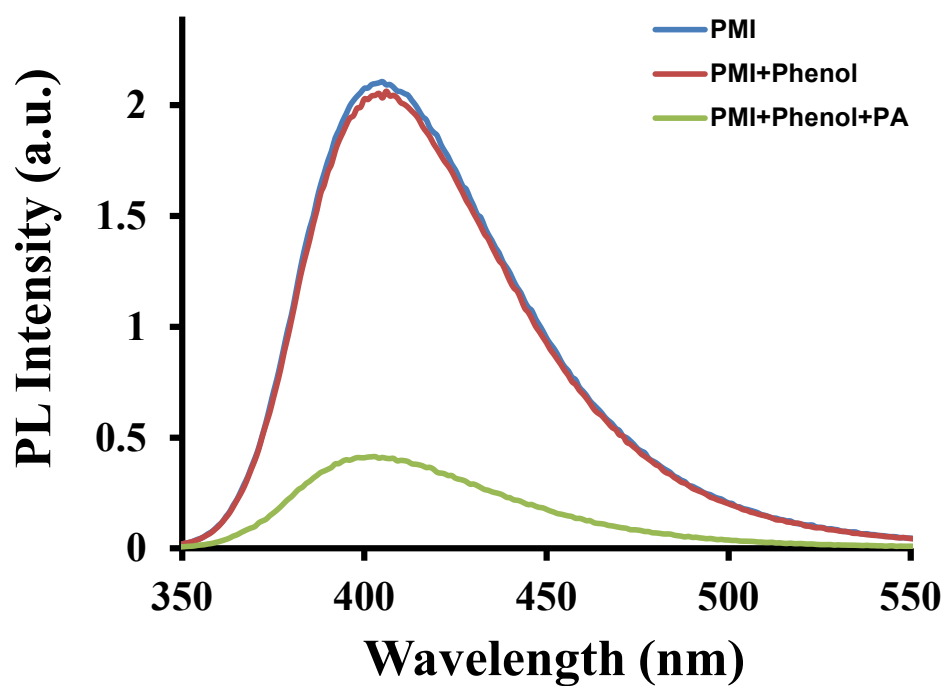

**Fig. S13** Change in emission spectra of PMI ( $2 \times 10^{-5}$  M) with Phenol ( $6.67 \times 10^{-7}$  M) followed by addition of PA ( $6.67 \times 10^{-7}$  M).

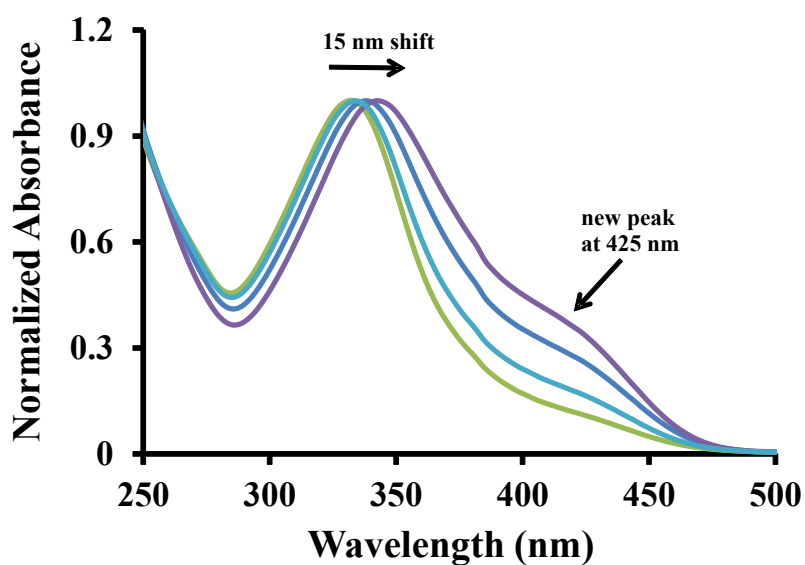

**Fig. S14** UV-Vis spectra of PMI upon addition of PA in water. The appearance of new band at 425 nm and red shift in the spectra indicates the formation of ground state complex with PA.

### Cyclic Voltammetry

The electrochemical study for PMI was performed using three-electrode cell at room temperature in inert atmosphere using argon. A glassy carbon electrode was used as working electrode. Pt wire and the saturated Ag/Ag<sup>+</sup> electrode were used as counter and reference electrodes, respectively. The Fc<sup>+</sup>/Fc couple was used as an internal reference with 0.1M tetrabutylammonium hexafluorophosphate (TBAPF<sub>6</sub>) as supporting electrolyte in CH<sub>3</sub>CN. Noticeable reduction potential was observed for PMI ( $E_{red} = -0.736\text{V}$ ) and LUMO ( $-4.364\text{eV}$ ) energy level was determined through onset calculation according to the method<sup>6</sup> reported for conjugated polymers. The HOMO value calculated by optical energy was found to be  $-7.674\text{eV}$ .

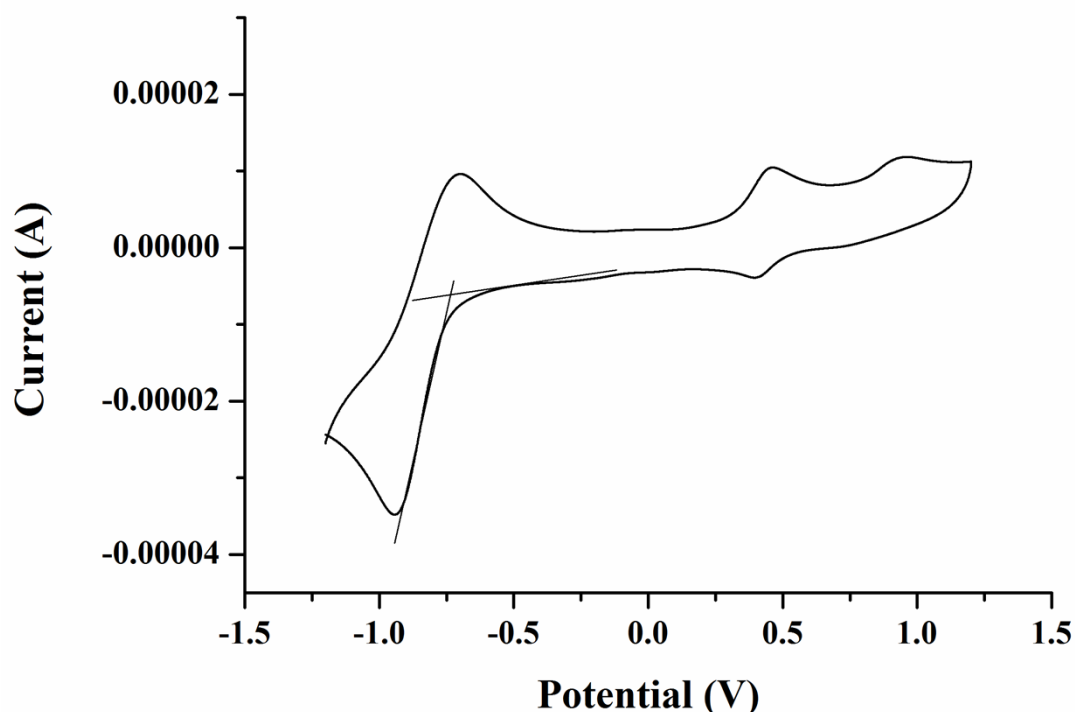

**Fig. S15** Cyclic voltammogram of PMI film on glassy carbon electrode in (0.1M) TBAF<sub>6</sub>, CH<sub>3</sub>CN solution with a scan rate of 50 mV/s.

### Computational Studies

The monomer of PMI (without two Br<sup>-</sup> anions) was used as model to obtain energy optimized structures by density functional theory (DFT) using B3LYP functional and 6-31G basis set in Gaussian 03<sup>7</sup> program. Picric acid, its corresponding picrate ion and various other nitroexplosives have been optimised for the analysis of charge transfer phenomenon.

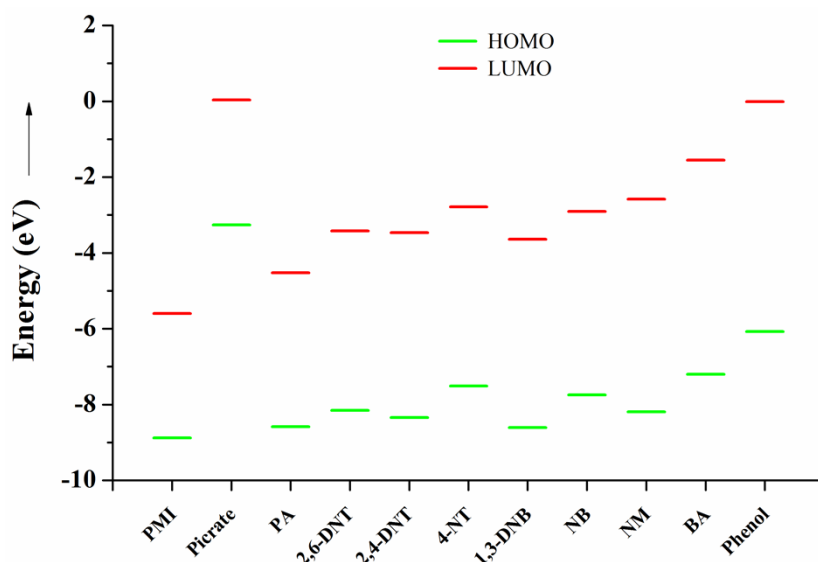

**Fig S16.** HOMO-LUMO energy levels for PMI and different analytes as calculated by B3LYP/6-31G DFT model.

**Table S2.** Overlap integral  $J(\lambda)$  values obtained for various analytes

| Compounds | $J(\lambda)$ values ( $M^{-1} cm^{-1} nm^4$ ) |
|-----------|-----------------------------------------------|
| PA        | $2.63 \times 10^{14}$                         |
| 2,6-DNT   | $3.90 \times 10^{12}$                         |
| 2,4-DNT   | $1.54 \times 10^{12}$                         |
| 4-NT      | $1.98 \times 10^{12}$                         |
| 1,3-DNB   | $5.16 \times 10^{12}$                         |
| NB        | $4.86 \times 10^{12}$                         |
| NM        | $8.32 \times 10^{12}$                         |
| BA        | $1.30 \times 10^{12}$                         |
| Phenol    | $6.24 \times 10^{12}$                         |

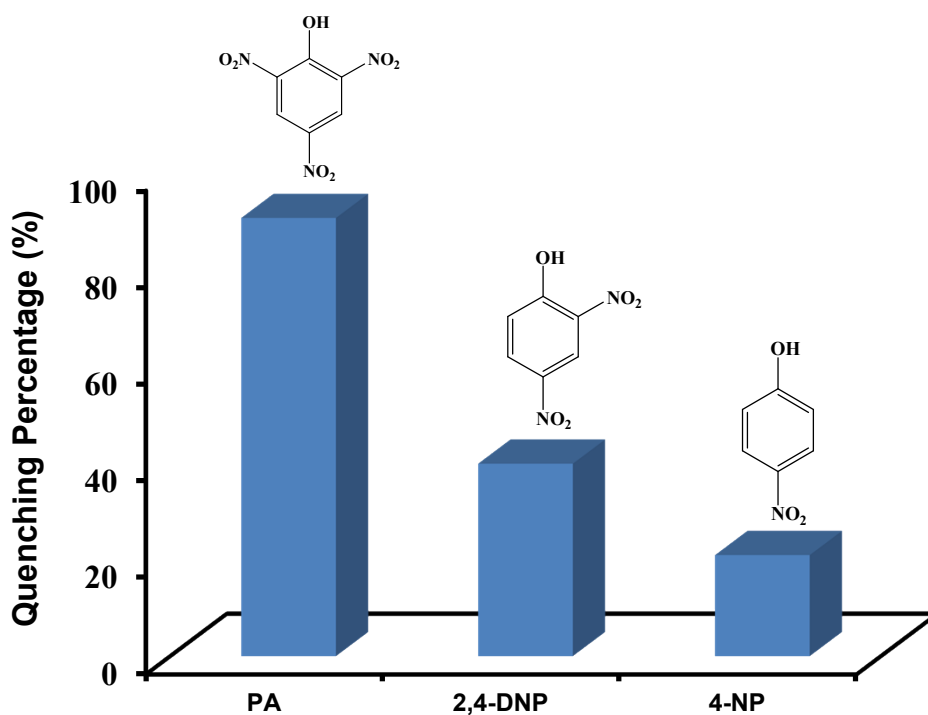

**Fig. S17** Comparison of percentage fluorescence quenching obtained on addition of PA, 2,4-DNP and 4-NP to the solution of PMI in water. Concentration of PMI and each analyte were  $2 \times 10^{-5}$  M and  $6.67 \times 10^{-7}$  M, respectively.

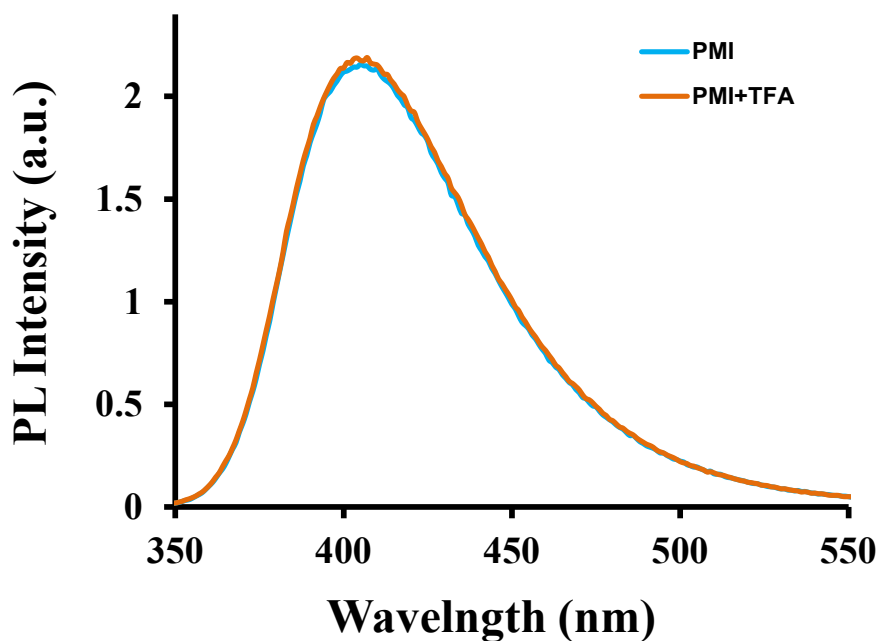

**Fig. S18.** Change in emission spectra of PMI ( $2 \times 10^{-5}$  M) after adding TFA ( $1 \times 10^{-6}$  M) in aqueous media.



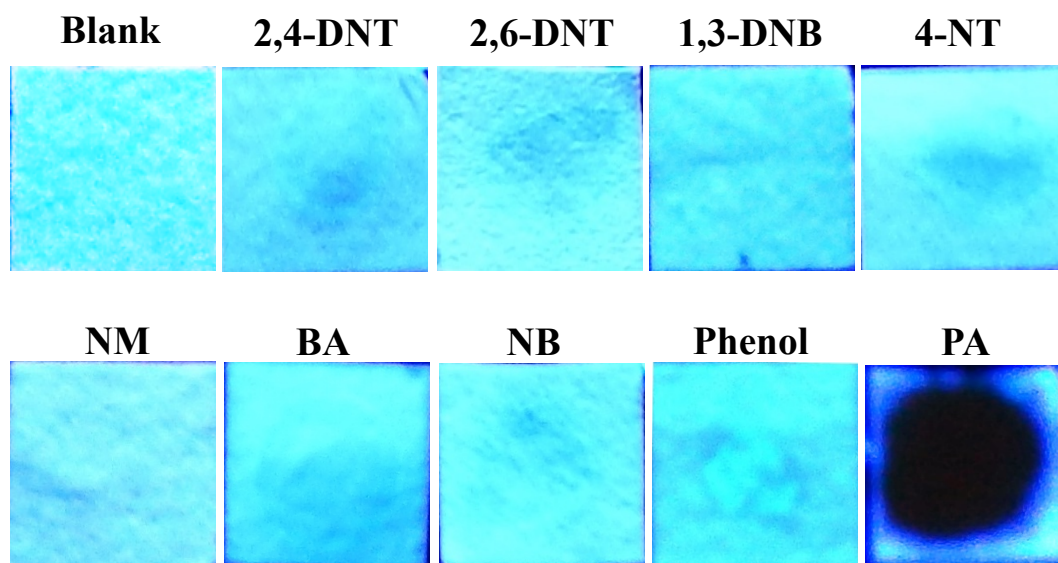

**Fig. S19** Colour of fluorescent test strips under UV light before and after addition (10 $\mu$ L) of 10<sup>-2</sup> M solution of various analytes.

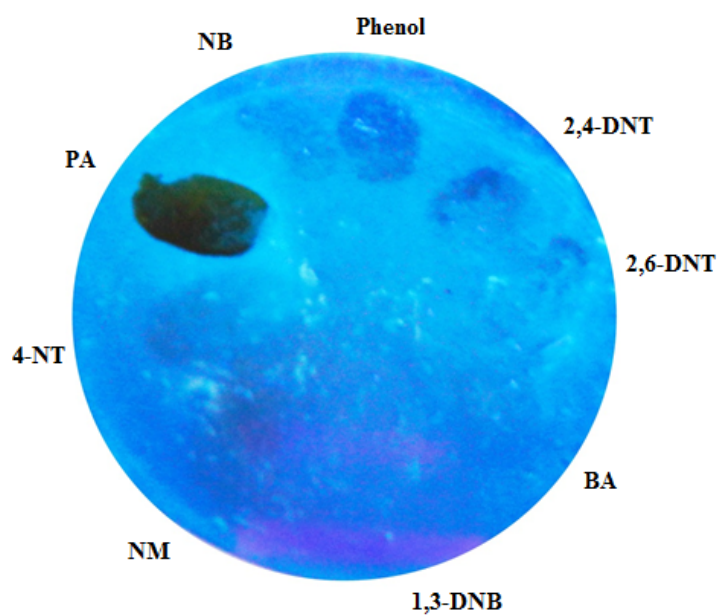

**Fig. S20** Visualization of PMI-doped CS fluorescent film under UV light with fingertip impression of different analytes.

### Optimized coordinates of PMI

| Center<br>Number | Atomic<br>Number | Atomic<br>Type | Coordinates (Angstroms) |           |           |
|------------------|------------------|----------------|-------------------------|-----------|-----------|
|                  |                  |                | X                       | Y         | Z         |
| 1                | 6                | 0              | -1.289473               | -0.031433 | -0.528791 |
| 2                | 6                | 0              | -0.649594               | -1.259685 | -0.326775 |
| 3                | 6                | 0              | 0.646319                | -1.287314 | 0.196771  |
| 4                | 6                | 0              | 1.289820                | -0.086571 | 0.517461  |
| 5                | 6                | 0              | 0.650053                | 1.141641  | 0.315278  |
| 6                | 6                | 0              | -0.646013               | 1.169258  | -0.208062 |
| 7                | 1                | 0              | -1.162853               | -2.176949 | -0.593015 |
| 8                | 1                | 0              | 1.156779                | -2.227768 | 0.371893  |
| 9                | 1                | 0              | 1.163117                | 2.059051  | 0.581427  |
| 10               | 1                | 0              | -1.156319               | 2.109844  | -0.382998 |
| 11               | 8                | 0              | 2.575134                | -0.117100 | 1.094774  |
| 12               | 8                | 0              | -2.574986               | -0.001981 | -1.105691 |
| 13               | 6                | 0              | 3.709551                | -0.077885 | 0.165700  |
| 14               | 1                | 0              | 3.656849                | -0.937794 | -0.517062 |
| 15               | 1                | 0              | 3.661334                | 0.840384  | -0.436600 |
| 16               | 6                | 0              | 4.972662                | -0.120049 | 1.018234  |
| 17               | 1                | 0              | 4.953971                | 0.734017  | 1.707220  |
| 18               | 1                | 0              | 4.941443                | -1.025792 | 1.637240  |
| 19               | 6                | 0              | 6.262801                | -0.096295 | 0.178105  |
| 20               | 1                | 0              | 6.270403                | -0.952153 | -0.512941 |
| 21               | 1                | 0              | 6.282736                | 0.809451  | -0.445828 |
| 22               | 6                | 0              | 7.529700                | -0.139064 | 1.054433  |
| 23               | 1                | 0              | 7.521027                | 0.717854  | 1.743610  |
| 24               | 1                | 0              | 7.505527                | -1.043299 | 1.679868  |
| 25               | 6                | 0              | 8.830094                | -0.120987 | 0.225898  |
| 26               | 1                | 0              | 8.841158                | -0.976807 | -0.462509 |
| 27               | 1                | 0              | 8.868104                | 0.786718  | -0.391033 |
| 28               | 6                | 0              | 10.068687               | -0.174166 | 1.134577  |
| 29               | 1                | 0              | 10.096922               | 0.684954  | 1.810830  |

|    |   |   |            |           |           |
|----|---|---|------------|-----------|-----------|
| 30 | 1 | 0 | 10.068536  | -1.078957 | 1.749533  |
| 31 | 6 | 0 | -3.708966  | -0.040398 | -0.176032 |
| 32 | 1 | 0 | -3.657634  | 0.821553  | 0.504195  |
| 33 | 1 | 0 | -3.658682  | -0.956844 | 0.428941  |
| 34 | 6 | 0 | -4.972603  | -0.004084 | -1.028060 |
| 35 | 1 | 0 | -4.951568  | 0.906508  | -1.640346 |
| 36 | 1 | 0 | -4.944508  | -0.852777 | -1.723337 |
| 37 | 6 | 0 | -6.262174  | -0.049504 | -0.187960 |
| 38 | 1 | 0 | -6.281083  | 0.801207  | 0.509131  |
| 39 | 1 | 0 | -6.269822  | -0.959876 | 0.429556  |
| 40 | 6 | 0 | -7.529807  | -0.018497 | -1.063730 |
| 41 | 1 | 0 | -7.523728  | 0.895081  | -1.675904 |
| 42 | 1 | 0 | -7.504273  | -0.864931 | -1.765310 |
| 43 | 6 | 0 | -8.829315  | -0.076252 | -0.235614 |
| 44 | 1 | 0 | -8.867293  | 0.771745  | 0.461097  |
| 45 | 1 | 0 | -8.838803  | -0.990931 | 0.372496  |
| 46 | 6 | 0 | -10.069021 | -0.047910 | -1.143891 |
| 47 | 1 | 0 | -10.062772 | -0.886472 | -1.846441 |
| 48 | 1 | 0 | -10.105225 | 0.874477  | -1.730500 |
| 49 | 7 | 0 | -11.345648 | -0.129524 | -0.381622 |
| 50 | 6 | 0 | -12.163793 | 0.904489  | -0.098851 |
| 51 | 6 | 0 | -11.873665 | -1.285660 | 0.192639  |
| 52 | 1 | 0 | -12.020582 | 1.924574  | -0.411050 |
| 53 | 6 | 0 | -13.032396 | -0.928822 | 0.827322  |
| 54 | 1 | 0 | -11.393230 | -2.243896 | 0.097859  |
| 55 | 1 | 0 | -13.740797 | -1.519536 | 1.382107  |
| 56 | 7 | 0 | 11.346784  | -0.168605 | 0.370443  |
| 57 | 6 | 0 | 12.154809  | 0.896104  | 0.191631  |
| 58 | 6 | 0 | 11.886925  | -1.257851 | -0.313001 |
| 59 | 1 | 0 | 12.001218  | 1.879245  | 0.602016  |
| 60 | 6 | 0 | 13.042360  | -0.829059 | -0.908005 |
| 61 | 1 | 0 | 11.416069  | -2.225491 | -0.313218 |
| 62 | 1 | 0 | 13.757073  | -1.355586 | -1.516709 |

|    |   |   |            |          |           |
|----|---|---|------------|----------|-----------|
| 63 | 7 | 0 | -13.197799 | 0.442709 | 0.635365  |
| 64 | 7 | 0 | 13.193925  | 0.518663 | -0.582420 |
| 65 | 6 | 0 | -14.329241 | 1.246985 | 1.140165  |
| 66 | 1 | 0 | -15.259248 | 0.896833 | 0.688340  |
| 67 | 1 | 0 | -14.385745 | 1.156156 | 2.226281  |
| 68 | 1 | 0 | -14.171011 | 2.292385 | 0.875195  |
| 69 | 6 | 0 | 14.318006  | 1.379548 | -1.003260 |
| 70 | 1 | 0 | 15.250561  | 0.997357 | -0.583788 |
| 71 | 1 | 0 | 14.378305  | 1.394310 | -2.092852 |
| 72 | 1 | 0 | 14.147684  | 2.392856 | -0.639517 |

#### Optimized coordinates of picrate

| Center<br>Number | Atomic<br>Number | Atomic<br>Type | Coordinates (Angstroms) |           |           |
|------------------|------------------|----------------|-------------------------|-----------|-----------|
|                  |                  |                | X                       | Y         | Z         |
| 1                | 6                | 0              | -0.571700               | -1.231579 | -0.000042 |
| 2                | 6                | 0              | 0.807625                | -1.216591 | 0.000012  |
| 3                | 6                | 0              | 1.501818                | -0.000098 | 0.000046  |
| 4                | 6                | 0              | 0.807783                | 1.216486  | 0.000045  |
| 5                | 6                | 0              | -0.571539               | 1.231653  | 0.000004  |
| 6                | 6                | 0              | -1.400198               | 0.000091  | -0.000122 |
| 7                | 1                | 0              | 1.350805                | -2.150897 | 0.000043  |
| 8                | 7                | 0              | 2.933134                | -0.000191 | 0.000112  |
| 9                | 7                | 0              | -1.184602               | 2.548924  | 0.000066  |
| 10               | 7                | 0              | -1.184936               | -2.548769 | -0.000032 |
| 11               | 8                | 0              | -2.654124               | 0.000172  | -0.000147 |
| 12               | 8                | 0              | -2.442360               | 2.669008  | 0.000304  |
| 13               | 8                | 0              | 3.547080                | -1.119924 | -0.000045 |
| 14               | 8                | 0              | -0.408401               | -3.570622 | -0.000037 |
| 15               | 8                | 0              | 3.547225                | 1.119462  | -0.000010 |
| 16               | 8                | 0              | -2.442710               | -2.668687 | 0.000118  |
| 17               | 8                | 0              | -0.407933               | 3.570674  | -0.000286 |
| 18               | 1                | 0              | 1.351086                | 2.150721  | 0.000096  |

#### Optimized coordinates of picric acid

| Center<br>Number | Atomic<br>Number | Atomic<br>Type | Coordinates (Angstroms) |   |   |
|------------------|------------------|----------------|-------------------------|---|---|
|                  |                  |                | X                       | Y | Z |

|    |   |   |           |           |           |
|----|---|---|-----------|-----------|-----------|
| 1  | 6 | 0 | 0.572349  | -1.184898 | -0.009717 |
| 2  | 6 | 0 | -0.819827 | -1.256628 | 0.018951  |
| 3  | 6 | 0 | -1.546951 | -0.076117 | 0.021583  |
| 4  | 6 | 0 | -0.917302 | 1.170854  | 0.001065  |
| 5  | 6 | 0 | 0.466951  | 1.231065  | -0.001214 |
| 6  | 6 | 0 | 1.267381  | 0.060771  | -0.021674 |
| 7  | 1 | 0 | -1.317540 | -2.217189 | 0.032379  |
| 8  | 7 | 0 | -3.009254 | -0.138479 | 0.042913  |
| 9  | 7 | 0 | 1.071361  | 2.570342  | 0.013872  |
| 10 | 7 | 0 | 1.307567  | -2.437524 | -0.033071 |
| 11 | 8 | 0 | 2.601735  | 0.167551  | -0.087213 |
| 12 | 1 | 0 | 3.016189  | -0.742717 | -0.111737 |
| 13 | 8 | 0 | 2.174640  | 2.726423  | 0.593387  |
| 14 | 8 | 0 | -3.546470 | -1.280711 | 0.052253  |
| 15 | 8 | 0 | 0.675038  | -3.518581 | 0.000904  |
| 16 | 8 | 0 | -3.640226 | 0.954373  | 0.051183  |
| 17 | 8 | 0 | 2.590885  | -2.387249 | -0.089001 |
| 18 | 8 | 0 | 0.403996  | 3.493953  | -0.537085 |
| 19 | 1 | 0 | -1.498755 | 2.083176  | -0.016042 |

---

## References:

1. G. S. Paul, P. J. Sarmah and P. K. Iyer, P. Agarwal, *Macromol. Chem. Phys.* 2008, **209**, 417-423.
2. A. J. J. M. van Breemen, P. T. Herwig, C. H. T. Chlon, J. Sweelssen, H. F. M. Schoo, E. M. Benito, D. M. de Leeuw, C. Tanase, J. Wildeman and P. W. M. Blom, *Adv. Funct. Mater.* 2005, **15**, 872-876.
3. G. Saikia, R. Singh, P. J. Sarmah, M. W. Akhtar, J. Sinha, M. Katiyar and P. K. Iyer, *Macromol. Chem. Phys.* 2009, **210**, 2153-2159.
4. S. Hussain, A. H. Malik and P. K. Iyer, *ACS Appl. Mater. Interfaces*, 2015, **7**, 3189-3198.
5. J. R. Lakowicz, *Principles of Florescence spectroscopy*, 3rd ed; Springer: Singapore, **2010**; pp 443–472.
6. C.M. Cardona, W. Li, A. E. Kaifer, D. Stockdale and G. C. Bazan, *Adv. Mater.* 2011, **23**, 2367-2371.
7. Gaussian 03, Revision E.01, M. J. Frisch, G. W. Trucks, H. B. Schlegel, G. E. Scuseria, M. A. Robb, J. R. Cheeseman, J. A. Montgomery, Jr., T. Vreven, K. N. Kudin, J. C. Burant, J. M. Millam, S. S. Iyengar, J. Tomasi, V. Barone, B. Mennucci, M. Cossi, G. Scalmani, N. Rega, G. A. Petersson, H. Nakatsuji, M. Hada, M. Ehara, K. Toyota, R. Fukuda, J. Hasegawa, M. Ishida, T. Nakajima, Y. Honda, O. Kitao, H. Nakai, M. Klene, X. Li, J. E. Knox, H. P. Hratchian, J. B. Cross, V. Bakken, C. Adamo, J. Jaramillo, R.

Gomperts, R. E. Stratmann, O. Yazyev, A. J. Austin, R. Cammi, C. Pomelli, J. W. Ochterski, P. Y. Ayala, K. Morokuma, G. A. Voth, P. Salvador, J. J. Dannenberg, V. G. Zakrzewski, S. Dapprich, A. D. Daniels, M. C. Strain, O. Farkas, D. K. Malick, A. D. Rabuck, K. Raghavachari, J. B. Foresman, J. V. Ortiz, Q. Cui, A. G. Baboul, S. Clifford, J. Cioslowski, B. B. Stefanov, G. Liu, A. Liashenko, P. Piskorz, I. Komaromi, R. L. Martin, D. J. Fox, T. Keith, M. A. Al-Laham, C. Y. Peng, A. Nanayakkara, M. Challacombe, P. M. W. Gill, B. Johnson, W. Chen, M. W. Wong, C. Gonzalez, and J. A. Pople, Gaussian, Inc., Wallingford CT, **2004**.
